# Supplementary material for: Impact on Autophagy and Ultraviolet B Induced Responses of Treatment with the MTOR Inhibitors Rapamycin, Everolimus, Torin 1, and pp242 in Human Keratinocytes
Source: Hindawi journal article supplement (doi:10.1155/2017/5930639), 2017-01-01

# Supplementary Fig.1

## (a) HEKs

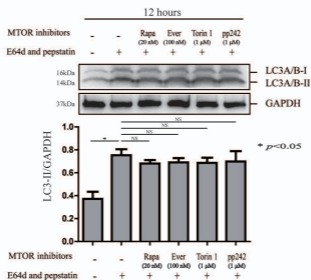

## (b) HaCaT cells

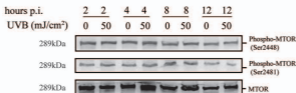

## (c) HaCaT cells

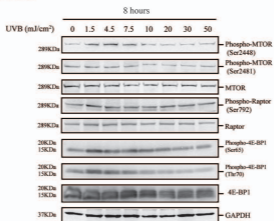

# Supplementary Fig.2

## (a) HEKs

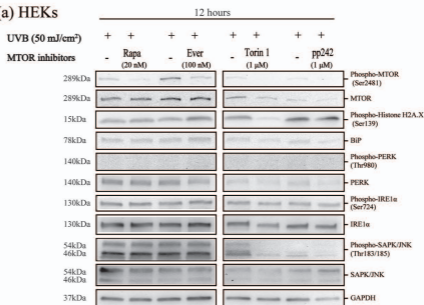

## (b) HaCaT cells

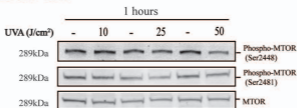

## (c) HaCaT cells

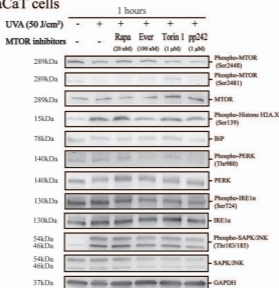

# Supplementary Fig.3

## (a) HEKs

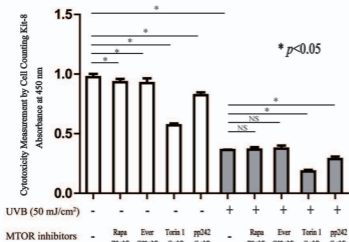

## (b) HEKs

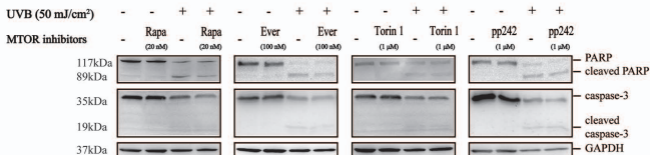

Supplement: f1 [file 5930639.f1.pdf]
